# Supplementary material for: Diacerein reduces inflammasome activation and SARS-CoV-2 virus replication: a proof-of-concept translational study
Source: Front Pharmacol. 2024 Oct 7;15:1402032. doi: 10.3389/fphar.2024.1402032 (PMC11491754; doi:10.3389/fphar.2024.1402032)
Supplement: Supplementary file 1 [file Table1.xlsx]

## Sheet: Sheet1
Peptide identifier	Ions used in quantitation	Ions	Deconvoluted peptide ions	Deconvoluted charges	Retention time (min)	Neutral mass	Score	Sequence	Accession	Description	Max fold change	Highest mean condition	Lowest mean condition	Anova	Maximum CV	VCC_Cov_Fofo.COVID	VCC_Cov_Fofo_2.COVID	VCC_Cov_Fofo_3.COVID	VCC_Mock_Fosfo.CTRL	VCC_Mock_Fosfo_2.CTRL	VCC_Mock_Fosfo_3.CTRL	VCC_Rhein_Cov_Fosfo.RHEIN	VCC_Rhein_Cov_Fosfo_2.RHEIN	VCC_Rhein_Cov_Fosfo3.RHEIN	gene_name	Modifications	Site	PSP:Sequence	PSP:psite	DEP_CTRLvsCOVID	DEP_CTRLvsRHEIN	DEP_COVIDvsRHEIN	MeanCTRL	meanCOVID	meanRHEIN	log2(COVID/CTRL)	log2(RHEIN/CTRL)	log2(RHEIN/COVID)
37.18_2694.2160n	1	1	#12754	3	37.1799	2694.22	4.933	LGLFVFsQEMVFFSDLKYECR	P07996	Thrombospondin-1 OS=Homo sapiens OX=9606 GN=THBS1 PE=1 SV=2	26.7513	CTRL	RHEM	0.0556505	153.057	38.182	213.281	2956.17	1029.69	1760.84	1849.64	55.9447	78.5973	38.9141	THBS1	7	Y817	DNCQYVyNVDQR	THBS1_Y817		X		1546.72	1069.21	57.8187	-0.532668	-4.74154	-4.20887
40.74_1328.6526n	1	1	#182	2	40.742	1328.65	5.4297	GVRVKEtADFK	P21333	Filamin-A OS=Homo sapiens OX=9606 GN=FLNA PE=1 SV=4	4.20003	RHEM	Covid	0.0488825	84.0065	4949.51	25573.7	49984	47703.9	52926.2	54405.6	113536	113598	110999	FLNA	7	T500	GVRVKEtADFK	FLNA_T500		X		51678.6	26835.7	112711	-0.945411	1.12499	2.0704
41.43_1770.6909n	3	3	#597,#70,#5928	2,3,4	41.4267	1770.69	4.215	MSYGGSTCHAYSNtR	A6NDE4	RNA-binding motif protein_ Y chromosome_ family 1 member B OS=Homo sapiens OX=9606 GN=RBMY1B PE=2 SV=2	5.99806	CTRL	RHEM	0.0279967	84.3433	23618.6	73644.6	172799	115703	145536	159484	26656.6	25339	18147.7	RBMY1B	14					X		140241	90020.7	23381.1	-0.639581	-2.5845	-1.94491
42.86_1304.5824n	1	1	#4286	2	42.8641	1304.58	4.86	ESYVGKEAQsK	A5A3E0	POTE ankyrin domain family member F OS=Homo sapiens OX=9606 GN=POTEF PE=1 SV=2	1.29591	RHEM	Covid	0.513618	70.4499	988.479	5614.98	7282.54	5322.81	6025.02	6128.09	6152.38	5729.59	6113.07	POTEF	10	S760	ESYVGKEAQsK	POTEF_S760				5825.3	4628.67	5998.35	-0.331737	0.042231	0.373968
43.49_1850.5769n	1	1	#45101	2	43.4925	1850.58	4.9376	DGWVyyANHtEEK	Q9NZC7	WW domain-containing oxidoreductase OS=Homo sapiens OX=9606 GN=WWOX PE=1 SV=1	7.27676	CTRL	RHEM	0.0293608	103.84	34.285	89.5491	329.38	300.746	320.537	370.937	44.962	55.7338	35.659	WWOX	5	Y33	DGWVyYANHTEEK	WWOX_Y33		X		330.74	151.071	45.4516	-1.13047	-2.8633	-1.73283
43.49_1850.5769n	1	1	#45101	2	43.4925	1850.58	4.9376	DGWVyyANHtEEK	Q9NZC7	WW domain-containing oxidoreductase OS=Homo sapiens OX=9606 GN=WWOX PE=1 SV=1	7.27676	CTRL	RHEM	0.0293608	103.84	34.285	89.5491	329.38	300.746	320.537	370.937	44.962	55.7338	35.659	WWOX	6					X		330.74	151.071	45.4516	-1.13047	-2.8633	-1.73283
43.49_1850.5769n	1	1	#45101	2	43.4925	1850.58	4.9376	DGWVyyANHtEEK	Q9NZC7	WW domain-containing oxidoreductase OS=Homo sapiens OX=9606 GN=WWOX PE=1 SV=1	7.27676	CTRL	RHEM	0.0293608	103.84	34.285	89.5491	329.38	300.746	320.537	370.937	44.962	55.7338	35.659	WWOX	10					X		330.74	151.071	45.4516	-1.13047	-2.8633	-1.73283
44.32_2485.1601n	1	1	#2536	3	44.3238	2485.16	5.2515	AsSLIEEAKKAAGHPGDPESQQR	Q9Y490	Talin-1 OS=Homo sapiens OX=9606 GN=TLN1 PE=1 SV=3	3.92812	CTRL	RHEM	0.169131	74.4495	1331.48	13797.1	12260.7	11077.1	11459.7	9311	2662.07	2763.92	2681.66	TLN1	2					X		10615.9	9129.78	2702.55	-0.217578	-1.97384	-1.75626
44.32_2507.1362n	1	1	#4990	3	44.3238	2507.14	4.7811	ELEsQISELQEDLEsERASR	P35579	Myosin-9 OS=Homo sapiens OX=9606 GN=MYH9 PE=1 SV=4	12.3029	CTRL	RHEM	0.0121711	72.1084	718.892	6194.97	5898.35	5210.21	5220.66	4350.67	285.401	531.957	384.11	MYH9	4	T360	ERNtDQASMPDNTAAQK	MYH9_T360		X	X	4927.18	4270.74	400.489	-0.206277	-3.62093	-3.41465
44.32_2507.1362n	1	1	#4990	3	44.3238	2507.14	4.7811	ELEsQISELQEDLEsERASR	P35579	Myosin-9 OS=Homo sapiens OX=9606 GN=MYH9 PE=1 SV=4	12.3029	CTRL	RHEM	0.0121711	72.1084	718.892	6194.97	5898.35	5210.21	5220.66	4350.67	285.401	531.957	384.11	MYH9	15	S1122	ELESQISELQEDLEsERASR	MYH9_S1122		X	X	4927.18	4270.74	400.489	-0.206277	-3.62093	-3.41465
44.56_2043.8888n	1	1	#3131	3	44.5605	2043.89	4.4971	SVPtSTVFYPSDGVAtEK	P29401	Transketolase OS=Homo sapiens OX=9606 GN=TKT PE=1 SV=3	1.32883	CTRL	RHEM	0.614823	56.4664	1058.46	3412.46	4188.14	3358.1	3741.24	3373.83	3121.65	2167.95	2591.91	TKT	4	T442	SVPtSTVFYPSDGVATEK	TKT_T442				3491.06	2886.36	2627.17	-0.274414	-0.410154	-0.13574
44.56_2043.8888n	1	1	#3131	3	44.5605	2043.89	4.4971	SVPtSTVFYPSDGVAtEK	P29401	Transketolase OS=Homo sapiens OX=9606 GN=TKT PE=1 SV=3	1.32883	CTRL	RHEM	0.614823	56.4664	1058.46	3412.46	4188.14	3358.1	3741.24	3373.83	3121.65	2167.95	2591.91	TKT	16							3491.06	2886.36	2627.17	-0.274414	-0.410154	-0.13574
45.02_1208.4357n	1	1	#7875	2	45.0198	1208.44	3.524	DAMQYASEsK	Q00610	Clathrin heavy chain 1 OS=Homo sapiens OX=9606 GN=CLTC PE=1 SV=5	1.4953	CTRL	RHEM	0.190708	30.7144	1117.01	2119.66	1667.98	2089.69	1906.89	1462.24	1201	1441.59	1008.06	CLTC	9	S1544	DAMQYASEsK	CLTC_S1544				1819.6	1634.88	1216.88	-0.154439	-0.580436	-0.425997
45.55_1921.8359n	1	1	#13940	3	45.5468	1921.84	4.4361	FLRENPyYDSRVVGK	Q00610	Clathrin heavy chain 1 OS=Homo sapiens OX=9606 GN=CLTC PE=1 SV=5	2.75145	CTRL	RHEM	0.0602383	56.3123	815.314	3139.11	2329.77	2239.7	2562.32	2142.77	1009.59	848.388	666.077	CLTC	7	Y899	FLRENPyYDSRVVGK	CLTC_Y899		X		2314.93	2094.73	841.35	-0.144203	-1.46019	-1.31599
45.55_1921.8359n	1	1	#13940	3	45.5468	1921.84	4.4361	FLRENPyYDSRVVGK	Q00610	Clathrin heavy chain 1 OS=Homo sapiens OX=9606 GN=CLTC PE=1 SV=5	2.75145	CTRL	RHEM	0.0602383	56.3123	815.314	3139.11	2329.77	2239.7	2562.32	2142.77	1009.59	848.388	666.077	CLTC	7	S1222	LLYNNVsNFGR	CLTC_S1222		X		2314.93	2094.73	841.35	-0.144203	-1.46019	-1.31599
45.58_1652.6536n	1	1	#6701	2	45.5806	1652.65	5.2753	DNCQyVYNVDQR	P07996	Thrombospondin-1 OS=Homo sapiens OX=9606 GN=THBS1 PE=1 SV=2	2.20079	CTRL	RHEM	0.17251	59.1687	1358.85	5763.54	4199.11	4994.11	4867.99	4446.62	2361.84	2146.03	1993.75	THBS1	5					X		4769.57	3773.83	2167.21	-0.33783	-1.13802	-0.800192
45.58_1882.7630n	2	2	#7011,#1627	2,3	45.5806	1882.76	4.0834	DETRNVGsQTLQtFK	P08514	Integrin alpha-IIb OS=Homo sapiens OX=9606 GN=ITGA2B PE=1 SV=3	1.95739	CTRL	RHEM	0.273489	58.1545	8803.3	37167.1	32665.9	33789.9	35006.3	32994.9	19227.1	17611.2	15165.3	ITGA2B	8					X		33930.4	26212.1	17334.5	-0.372345	-0.968928	-0.596583
45.58_1882.7630n	2	2	#7011,#1627	2,3	45.5806	1882.76	4.0834	DETRNVGsQTLQtFK	P08514	Integrin alpha-IIb OS=Homo sapiens OX=9606 GN=ITGA2B PE=1 SV=3	1.95739	CTRL	RHEM	0.273489	58.1545	8803.3	37167.1	32665.9	33789.9	35006.3	32994.9	19227.1	17611.2	15165.3	ITGA2B	13					X		33930.4	26212.1	17334.5	-0.372345	-0.968928	-0.596583
46.41_1673.8179n	1	1	#4566	3	46.4122	1673.82	5.052	TTFNsIVKSDVDIR	Q9BYX7	Putative beta-actin-like protein 3 OS=Homo sapiens OX=9606 GN=POTEKP PE=5 SV=1	1.5068	CTRL	RHEM	0.541712	65.4898	674.485	3293.8	3921.71	3383.08	3553.22	3357.14	2425.2	2664.38	1741.74	POTEKP	5					X		3431.15	2630	2277.11	-0.38363	-0.591487	-0.207857
46.51_1553.6883n	2	2	#710,#211	2,3	46.5136	1553.69	0	GVEMAGQAPsQEDR	Q9Y490	Talin-1 OS=Homo sapiens OX=9606 GN=TLN1 PE=1 SV=3	2.21942	CTRL	RHEM	0.110878	51.7895	39681.7	133584	116690	112285	113963	116193	56666.9	52585.8	45040.6	TLN1	10					X		114147	96652	51431.1	-0.240024	-1.15018	-0.910159
46.58_3311.3211n	1	1	#5318	3	46.5812	3311.32	4.7516	NLRGYYNQSEAGsHTLQSMYGCDVGPDGR	P01889	HLA class I histocompatibility antigen_ B alpha chain OS=Homo sapiens OX=9606 GN=HLA-B PE=1 SV=3	inf	Covid	RHEM	3.42392e-10	21.699	11056.2	9985.05	7117.1	6464.98	6664.17	7953.81	0	0	0	HLA-B	13					X	X	7027.65	9386.11	0	0.417485	#NAME?	#NAME?
47.38_1468.6241n	1	1	#3227	2	47.3787	1468.62	4.229	DYAPPsRGHAYR	A6NDE4	RNA-binding motif protein_ Y chromosome_ family 1 member B OS=Homo sapiens OX=9606 GN=RBMY1B PE=2 SV=2	1.483	CTRL	RHEM	0.0223475	18.6843	12211.8	15628.2	13222.4	14605	15768.3	15719.9	9778.52	8782.2	12520.3	RBMY1B	6					X		15364.4	13687.4	10360.3	-0.166737	-0.56852	-0.401783
47.67_1375.6341n	2	2	#91,#242	2,3	47.669	1375.63	4.6009	LLYNNVsNFGR	Q00610	Clathrin heavy chain 1 OS=Homo sapiens OX=9606 GN=CLTC PE=1 SV=5	2.94709	CTRL	RHEM	0.0503884	53.5955	36391.9	129728	116172	157789	156053	159415	62570.5	54799.7	43214.2	CLTC	7	Y899	FLRENPyYDSRVVGK	CLTC_Y899		X		157752	94097.1	53528.1	-0.74544	-1.55929	-0.813853
47.67_1375.6341n	2	2	#91,#242	2,3	47.669	1375.63	4.6009	LLYNNVsNFGR	Q00610	Clathrin heavy chain 1 OS=Homo sapiens OX=9606 GN=CLTC PE=1 SV=5	2.94709	CTRL	RHEM	0.0503884	53.5955	36391.9	129728	116172	157789	156053	159415	62570.5	54799.7	43214.2	CLTC	7	S1222	LLYNNVsNFGR	CLTC_S1222		X		157752	94097.1	53528.1	-0.74544	-1.55929	-0.813853
49.69_1686.7298n	2	2	#4197,#2215	2,3	49.6868	1686.73	4.835	NTDQASMPDNtAAQK	P35579	Myosin-9 OS=Homo sapiens OX=9606 GN=MYH9 PE=1 SV=4	2.43756	Covid	RHEM	0.00049511	22.0573	36264	27333.5	23795.8	19929.5	18929.3	21014.7	11821.8	12387.8	11643.1	MYH9	11	T369	NTDQASMPDNtAAQK	MYH9_T369	X	X	X	19957.8	29131.1	11950.9	0.545607	-0.739829	-1.28544
50.03_1931.8011n	1	1	#1488	3	50.0278	1931.8	4.611	LQWDGsSDLSPSDSGSSK	Q14CW9	Ataxin-7-like protein 3 OS=Homo sapiens OX=9606 GN=ATXN7L3 PE=1 SV=1	2.84824	Covid	RHEM	3.7173e-05	15.4411	39283.8	31682.7	29420.3	24987.4	24426.7	24909.3	12750.9	11729.6	10764.6	ATXN7L3	6				X	X	X	24774.5	33462.3	11748.4	0.43368	-1.07639	-1.51007
50.62_1804.7517n	1	1	#7029	2	50.6224	1804.75	4.9355	EGMNIVEAMERFGsR	P62937	Peptidyl-prolyl cis-trans isomerase A OS=Homo sapiens OX=9606 GN=PPIA PE=1 SV=2	2.77566	Covid	RHEM	0.00024028	21.411	9143.29	6858.87	6114.14	5255.09	5102.22	4752.86	2881.05	2621.51	2465.39	PPIA	14	S147	EGMNIVEAMERFGsR	PPIA_S147	X	X	X	5036.72	7372.1	2655.98	0.549591	-0.923239	-1.47283
51.10_1475.6870n	1	1	#5797	2	51.0958	1475.69	5.4352	QEDVIAtANLsR	Q9Y490	Talin-1 OS=Homo sapiens OX=9606 GN=TLN1 PE=1 SV=3	1.62287	Covid	RHEM	0.00138008	12.7989	14283	13671.7	11137.6	13296.5	12819.4	12593.4	8999.93	7484.6	7603.85	TLN1	7					X	X	12903.1	13030.8	8029.46	0.0142049	-0.684342	-0.698547
51.10_1475.6870n	1	1	#5797	2	51.0958	1475.69	5.4352	QEDVIAtANLsR	Q9Y490	Talin-1 OS=Homo sapiens OX=9606 GN=TLN1 PE=1 SV=3	1.62287	Covid	RHEM	0.00138008	12.7989	14283	13671.7	11137.6	13296.5	12819.4	12593.4	8999.93	7484.6	7603.85	TLN1	11					X	X	12903.1	13030.8	8029.46	0.0142049	-0.684342	-0.698547
51.49_1737.8369n	1	1	#2953	3	51.4875	1737.84	4.568	AAVENLPtFLVELSR	Q14974	Importin subunit beta-1 OS=Homo sapiens OX=9606 GN=KPNB1 PE=1 SV=2	1.59038	Covid	RHEM	0.0312706	22.0344	20908.1	15130.9	15447.1	15801	15345.8	15000.4	13116.4	10892.9	8364.15	KPNB1	8					X	X	15382.4	17162	10791.1	0.157937	-0.511434	-0.669371
51.79_1930.6989n	1	1	#13051	2	51.7918	1930.7	5.2052	tMQFEPSTMVYDACR	Q9Y490	Talin-1 OS=Homo sapiens OX=9606 GN=TLN1 PE=1 SV=3	2.01074	RHEM	CTRL	0.00344925	25.7962	4226.7	3132.41	2548.51	2910.37	2707.19	2549.26	5478.94	5699.47	5242.91	TLN1	1					X	X	2722.27	3302.54	5473.77	0.278764	1.00772	0.728958
52.44_2038.8872n	2	2	#2736,#998	2,3	52.4371	2038.89	4.4358	YRFLSNGHVtIPGQQDK	P35579	Myosin-9 OS=Homo sapiens OX=9606 GN=MYH9 PE=1 SV=4	2.09439	Covid	RHEM	0.000595563	17.1231	75070.4	59559.6	54332.8	62192.5	57895.3	59624	34540.7	29205	26477.8	MYH9	10	T1155	TELEDTLDStAAQQELR	MYH9_T1155		X	X	59903.9	62987.6	30074.5	0.0724183	-0.994111	-1.06653
53.15_2587.1473n	1	1	#10534	3	53.1501	2587.15	4.8441	TSRPENAIIyNNNEDFQVGQAK	P29401	Transketolase OS=Homo sapiens OX=9606 GN=TKT PE=1 SV=3	2.69437	Covid	RHEM	0.00203639	24.8973	1477.7	1063.48	1097.42	1304.14	990.128	962.268	476.325	546.821	327.303	TKT	10	Y481	TSRPENAIIyNNNEDFQVGQAK	TKT_Y481		X	X	1085.51	1212.87	450.15	0.160049	-1.2699	-1.42995
53.61_1715.8106n	1	1	#7354	3	53.6097	1715.81	5.2238	TPSCKDIVAGDMsKK	P33241	Lymphocyte-specific protein 1 OS=Homo sapiens OX=9606 GN=LSP1 PE=1 SV=1	1.86829	RHEM	CTRL	0.00886276	23.6419	11825.9	9675.45	9327.47	9932.28	8805.72	9169.3	20917.5	18348.6	12872.9	LSP1	13	S292	TPSCKDIVAGDMsKK	LSP1_S292		X	X	9302.43	10276.3	17379.7	0.143635	0.901721	0.758086
53.78_1795.6444n	2	2	#12286,#9873	2,3	53.7787	1795.64	4.2002	VDINtEDLEDGtCR	P21333	Filamin-A OS=Homo sapiens OX=9606 GN=FLNA PE=1 SV=4	3.30003	CTRL	RHEM	0.0140894	76.2461	6973.95	4756.29	5249.47	7062.03	6254.7	6100.16	3685.85	1174.17	1023.84	FLNA	5					X	X	6472.3	5659.9	1961.29	-0.193501	-1.72248	-1.52898
53.78_1795.6444n	2	2	#12286,#9873	2,3	53.7787	1795.64	4.2002	VDINtEDLEDGtCR	P21333	Filamin-A OS=Homo sapiens OX=9606 GN=FLNA PE=1 SV=4	3.30003	CTRL	RHEM	0.0140894	76.2461	6973.95	4756.29	5249.47	7062.03	6254.7	6100.16	3685.85	1174.17	1023.84	FLNA	12					X	X	6472.3	5659.9	1961.29	-0.193501	-1.72248	-1.52898
53.85_1795.8135n	1	1	#12992	3	53.8463	1795.81	4.2002	VDINtEDLEDGtCR	P21333	Filamin-A OS=Homo sapiens OX=9606 GN=FLNA PE=1 SV=4	2.84625	Covid	RHEM	0.0141644	60.638	4071.14	2726.46	2935.38	3235.93	3024.87	2920.89	1913.21	924.032	582.338	FLNA	5					X	X	3060.56	3244.33	1139.86	0.0841239	-1.42494	-1.50906
53.85_1795.8135n	1	1	#12992	3	53.8463	1795.81	4.2002	VDINtEDLEDGtCR	P21333	Filamin-A OS=Homo sapiens OX=9606 GN=FLNA PE=1 SV=4	2.84625	Covid	RHEM	0.0141644	60.638	4071.14	2726.46	2935.38	3235.93	3024.87	2920.89	1913.21	924.032	582.338	FLNA	12					X	X	3060.56	3244.33	1139.86	0.0841239	-1.42494	-1.50906
56.00_2692.1904n	3	3	#7678,#129,#513	2,3,4	56.0022	2692.19	5.0917	RCEAFGWHAIIVDGHsVEELCK	P29401	Transketolase OS=Homo sapiens OX=9606 GN=TKT PE=1 SV=3	9.97001	CTRL	RHEM	1.1422e-06	15.9452	124871	94458.1	97198.9	121768	139052	145105	11910.7	13199.6	15604.3	TKT	16					X	X	135308	105509	13571.5	-0.358881	-3.3176	-2.95871
56.17_2205.9661n	1	1	#2294	3	56.1713	2205.97	4.891	EEYPDRIMNsFSVMPSPK	Q9H4B7	Tubulin beta-1 chain OS=Homo sapiens OX=9606 GN=TUBB1 PE=1 SV=1	1.7303	Covid	RHEM	0.000198936	11.934	12373.3	9784.51	10743.5	10283.4	9568.21	10133.9	6258.68	6487.57	6268.52	TUBB1	10					X	X	9995.18	10967.1	6338.26	0.133879	-0.657145	-0.791025
57.46_1548.6633n	1	1	#3629	2	57.4619	1548.66	5.0109	ENVVQSVtsVAEK	O76070	Gamma-synuclein OS=Homo sapiens OX=9606 GN=SNCG PE=1 SV=2	1.30793	CTRL	RHEM	0.0241366	12.5378	16308.9	14130.3	13076.1	15123.7	14150.8	14629.2	10907.1	9948.69	12711.6	SNCG	8					X		14634.6	14505.1	11189.1	-0.0128199	-0.387284	-0.374464
57.46_1548.6633n	1	1	#3629	2	57.4619	1548.66	5.0109	ENVVQSVtsVAEK	O76070	Gamma-synuclein OS=Homo sapiens OX=9606 GN=SNCG PE=1 SV=2	1.30793	CTRL	RHEM	0.0241366	12.5378	16308.9	14130.3	13076.1	15123.7	14150.8	14629.2	10907.1	9948.69	12711.6	SNCG	9	S54	ENVVQSVTsVAEK	SNCG_S54		X		14634.6	14505.1	11189.1	-0.0128199	-0.387284	-0.374464
57.46_1955.8342n	1	1	#9212	2	57.4619	1955.83	4.762	ERNTDQASMPDNtAAQK	P35579	Myosin-9 OS=Homo sapiens OX=9606 GN=MYH9 PE=1 SV=4	1.17541	CTRL	Covid	0.290546	14.6337	6116.26	4954.35	4666.26	6201.72	6150.4	6145.16	6192.25	4851.05	6340.66	MYH9	13	T369	ERNTDQASMPDNtAAQK	MYH9_T369				6165.76	5245.62	5794.66	-0.233165	-0.0895556	0.143609
57.77_2516.0641n	1	1	#2692	3	57.7662	2516.06	4.9046	GAGTGGLGLAVEGPsEAKMSCMDNK	P21333	Filamin-A OS=Homo sapiens OX=9606 GN=FLNA PE=1 SV=4	2.63507	CTRL	RHEM	0.0001799	17.4534	11188.7	8747.4	9031.61	11251.5	10286.4	10868.7	4108.05	3379.61	4810.5	FLNA	15	S1396	GAGTGGLGLAVEGPsEAKMSCMDNK	FLNA_S1396		X	X	10802.2	9655.89	4099.39	-0.161843	-1.39784	-1.236
57.77_2516.0641n	1	1	#2692	3	57.7662	2516.06	4.9046	GAGTGGLGLAVEGPsEAKMSCMDNK	P21333	Filamin-A OS=Homo sapiens OX=9606 GN=FLNA PE=1 SV=4	2.63507	CTRL	RHEM	0.0001799	17.4534	11188.7	8747.4	9031.61	11251.5	10286.4	10868.7	4108.05	3379.61	4810.5	FLNA	15	S2180	IPEISIQDMTAQVTsPSGKTHEAEIVEGENHTYCIR	FLNA_S2180		X	X	10802.2	9655.89	4099.39	-0.161843	-1.39784	-1.236
57.87_2758.1498n	1	1	#7884	3	57.8676	2758.15	4.7172	YDDMAsAMKAVTELNEPLsNEDR	Q04917	14-3-3 protein eta OS=Homo sapiens OX=9606 GN=YWHAH PE=1 SV=4	2.68149	CTRL	RHEM	0.000994793	24.6286	2175.13	1445.28	1460.32	1913.59	1811.29	2000.22	630.625	618.403	886.012	YWHAH	6					X	X	1908.37	1693.57	711.68	-0.172267	-1.42304	-1.25077
57.87_2758.1498n	1	1	#7884	3	57.8676	2758.15	4.7172	YDDMAsAMKAVTELNEPLsNEDR	Q04917	14-3-3 protein eta OS=Homo sapiens OX=9606 GN=YWHAH PE=1 SV=4	2.68149	CTRL	RHEM	0.000994793	24.6286	2175.13	1445.28	1460.32	1913.59	1811.29	2000.22	630.625	618.403	886.012	YWHAH	19					X	X	1908.37	1693.57	711.68	-0.172267	-1.42304	-1.25077
59.43_2977.2334n	1	1	#14274	3	59.4291	2977.23	5.255	KEGICAIGGtSEQSSVGTQHSYSEEEK	P13796	Plastin-2 OS=Homo sapiens OX=9606 GN=LCP1 PE=1 SV=6	3.85488	CTRL	RHEM	0.000619105	28.2015	691.027	747.405	473.929	776.559	690.086	676.751	224.631	126.019	205.373	LCP1	10					X	X	714.465	637.454	185.341	-0.164544	-1.94668	-1.78214
60.55_1654.7805n	1	1	#4287	2	60.5506	1654.78	4.4894	RsSWRVISSIEQK	Q04917	14-3-3 protein eta OS=Homo sapiens OX=9606 GN=YWHAH PE=1 SV=4	1.1952	Covid	RHEM	0.146673	12.3062	5970.14	4927.69	4794.63	5052.23	4424.85	5489.04	4217.45	4454.06	4458.04	YWHAH	2							4988.71	5230.82	4376.52	0.0683711	-0.188882	-0.257253
62.67_1772.7750n	1	1	#939	2	62.6725	1772.77	4.9207	DGDGTITTKELGtVMR	P0DP23	Calmodulin-1 OS=Homo sapiens OX=9606 GN=CALM1 PE=1 SV=1	6.95861	Covid	RHEM	1.76377e-05	25.4374	29463.2	26231.5	24214.4	14689.9	13556.2	14032	3855.61	4787.34	2840.54	CALM1	13				X	X	X	14092.7	26636.4	3827.83	0.918452	-1.88035	-2.7988
63.71_1859.7392n	1	1	#16017	2	63.7069	1859.74	5.1956	TDYNASVSVPDsSGPER	P61978	Heterogeneous nuclear ribonucleoprotein K OS=Homo sapiens OX=9606 GN=HNRNPK PE=1 SV=1	1.33228	Covid	CTRL	0.0909986	25.0822	4108.06	4457.8	4290.22	3392.35	3324.33	2933.02	2829.17	2867.16	4294.61	HNRNPK	12				X			3216.57	4285.36	3330.32	0.413895	0.0501375	-0.363758
63.84_1501.7367n	1	1	#706	2	63.8421	1501.74	5.2035	SSPFKVsPLTFGR	O95810	Caveolae-associated protein 2 OS=Homo sapiens OX=9606 GN=CAVIN2 PE=1 SV=3	1.82059	CTRL	RHEM	0.000363756	12.3344	35471.8	33260.2	32038.6	34484.1	39537	34428.3	20388.7	17184.5	21995.2	CAVIN2	7					X	X	36149.8	33590.2	19856.1	-0.105947	-0.864403	-0.758455
66.08_1852.8030n	2	2	#591,#10408	2,3	66.0824	1852.8	5.3446	DGDGtITTKELGtVMR	P0DP23	Calmodulin-1 OS=Homo sapiens OX=9606 GN=CALM1 PE=1 SV=1	1.81965	RHEM	CTRL	0.000119236	10.6217	29115.3	28474.5	27695.5	19831.9	20328.8	21551.9	37373.4	41436.7	33485.6	CALM1	5				X	X	X	20570.9	28428.5	37431.9	0.466733	0.863664	0.396931
66.08_1852.8030n	2	2	#591,#10408	2,3	66.0824	1852.8	5.3446	DGDGtITTKELGtVMR	P0DP23	Calmodulin-1 OS=Homo sapiens OX=9606 GN=CALM1 PE=1 SV=1	1.81965	RHEM	CTRL	0.000119236	10.6217	29115.3	28474.5	27695.5	19831.9	20328.8	21551.9	37373.4	41436.7	33485.6	CALM1	13				X	X	X	20570.9	28428.5	37431.9	0.466733	0.863664	0.396931
66.86_1462.6716n	1	1	#785	2	66.8629	1462.67	4.9656	MSKNTVsSARFR	O15511	Actin-related protein 2/3 complex subunit 5 OS=Homo sapiens OX=9606 GN=ARPC5 PE=1 SV=3	2.24967	CTRL	RHEM	3.87379e-05	11.1645	31754.3	27396	26590.7	28516.5	30421.1	30220.4	12219.6	12506.5	14905.5	ARPC5	7					X	X	29719.3	28580.3	13210.6	-0.0563799	-1.16971	-1.11333
67.39_1675.7512n	1	1	#2653	2	67.3899	1675.75	4.9794	AGALQCSPSDAYtKK	Q9Y490	Talin-1 OS=Homo sapiens OX=9606 GN=TLN1 PE=1 SV=3	1.26134	Covid	CTRL	0.0245769	11.4798	19567.7	18833.7	20099.7	14688.4	15486.4	16205.3	19057.8	15894.2	19861.8	TLN1	13				X			15460	19500.4	18271.3	0.334957	0.241033	-0.0939237
67.39_3539.5041n	1	1	#10743	3	67.3899	3539.5	4.503	IIENAENEYQTAISENYQTMSDttFKALR	P52907	F-actin-capping protein subunit alpha-1 OS=Homo sapiens OX=9606 GN=CAPZA1 PE=1 SV=3	inf	Covid	RHEM	1.84815e-11	13.1588	3500.68	3944.05	3675.56	3011.05	3397.77	3913.52	0	0	0	CAPZA1	23					X	X	3440.78	3706.76	0	0.107425	#NAME?	#NAME?
67.39_3539.5041n	1	1	#10743	3	67.3899	3539.5	4.503	IIENAENEYQTAISENYQTMSDttFKALR	P52907	F-actin-capping protein subunit alpha-1 OS=Homo sapiens OX=9606 GN=CAPZA1 PE=1 SV=3	inf	Covid	RHEM	1.84815e-11	13.1588	3500.68	3944.05	3675.56	3011.05	3397.77	3913.52	0	0	0	CAPZA1	24					X	X	3440.78	3706.76	0	0.107425	#NAME?	#NAME?
67.78_2038.9360n	1	1	#12088	3	67.7816	2038.94	4.3628	LAFTVDDNPtKPTTRQR	Q9NZC7	WW domain-containing oxidoreductase OS=Homo sapiens OX=9606 GN=WWOX PE=1 SV=1	2.82716	Covid	RHEM	0.000382943	20.0687	1886.35	1566.7	1635.75	1227.65	1081.27	1378.85	470.29	708.222	621.456	WWOX	10				X	X	X	1229.26	1696.27	599.989	0.464578	-1.03478	-1.49936
69.02_1810.8066n	1	1	#1917	2	69.0189	1810.81	5.1947	RsRLCNNPTPQFGGK	P07996	Thrombospondin-1 OS=Homo sapiens OX=9606 GN=THBS1 PE=1 SV=2	1.77986	RHEM	CTRL	0.00164921	16.643	19283.9	15665.8	16735	17729.2	15628.5	16604.6	35261.6	27639.2	26024.9	THBS1	2					X	X	16654.1	17228.2	29641.9	0.0489004	0.831763	0.782862
69.46_1998.9086n	2	2	#15183,#1447	2,3	69.4613	1998.91	5.2724	TELEDtLDSTAAQQELR	P35579	Myosin-9 OS=Homo sapiens OX=9606 GN=MYH9 PE=1 SV=4	1.21264	Covid	RHEM	0.0588586	8.3522	28475.9	24408.8	25319.6	25961	22967.5	23366.3	23171.1	21718.9	19600.8	MYH9	6	S364	NTDQAsMPDNTAAQK	MYH9_S364			X	24098.3	26068.1	21496.9	0.113357	-0.164798	-0.278155
69.46_1998.9086n	2	2	#15183,#1447	2,3	69.4613	1998.91	5.2724	TELEDtLDSTAAQQELR	P35579	Myosin-9 OS=Homo sapiens OX=9606 GN=MYH9 PE=1 SV=4	1.21264	Covid	RHEM	0.0588586	8.3522	28475.9	24408.8	25319.6	25961	22967.5	23366.3	23171.1	21718.9	19600.8	MYH9	6	T1151	TELEDtLDSTAAQQELR	MYH9_T1151			X	24098.3	26068.1	21496.9	0.113357	-0.164798	-0.278155
69.51_2384.9979n	1	1	#22399	2	69.5121	2385	4.6376	FYNNHAFEEQEPPEKsDPK	Q15506	Sperm surface protein Sp17 OS=Homo sapiens OX=9606 GN=SPA17 PE=1 SV=1	inf	CTRL	RHEM	4.58896e-10	16.0461	805.35	1086.97	1072.49	1052.65	1225.68	951.991	0	0	0	SPA17	16					X	X	1076.78	988.27	0	-0.123741	#NAME?	#NAME?
70.04_2698.1600n	1	1	#7106	3	70.039	2698.16	4.4796	QELAVFCSPEPPAKtSTPEDFIR	Q9Y490	Talin-1 OS=Homo sapiens OX=9606 GN=TLN1 PE=1 SV=3	5.60022	RHEM	CTRL	9.35634e-06	24.6933	3032.62	3102.17	3044.75	2647.33	2486.76	2520.94	18328.4	12739	11802.3	TLN1	15				X	X	X	2551.68	3059.85	14289.9	0.262014	2.48548	2.22347
70.51_2540.1368n	1	1	#42731	3	70.5124	2540.14	4.079	KMQQNIQELEEQLEEEEsAR	P35579	Myosin-9 OS=Homo sapiens OX=9606 GN=MYH9 PE=1 SV=4	1.36142	Covid	RHEM	0.727319	63.4922	200.827	87.7808	155.077	53.3295	169.828	190.201	36.1951	173.521	116.183	MYH9	18	S957	KMQQNIQELEEQLEEEEsAR	MYH9_S957				137.786	147.895	108.633	0.102141	-0.342971	-0.445112
70.58_1914.7701n	1	1	#2864	2	70.58	1914.77	4.6983	EEEIAALVIDNGsGMCK	P63261	Actin_ cytoplasmic 2 OS=Homo sapiens OX=9606 GN=ACTG1 PE=1 SV=1	3.58682	Covid	RHEM	0.000405379	29.8727	9841.13	9225.45	8384.89	5081.2	5432.39	5018.01	3322.92	1799.12	2531.38	ACTG1	13	S14	EEEIAALVIDNGsGMCK	ACTG1_S14	X	X	X	5177.2	9150.49	2551.14	0.821677	-1.02103	-1.84271
72.23_1834.7366n	1	1	#6021	2	72.2285	1834.74	4.1565	sPEHHSQFVTDVDEE	Q9NRE2	Teashirt homolog 2 OS=Homo sapiens OX=9606 GN=TSHZ2 PE=1 SV=3	1.94013	RHEM	Covid	0.0110018	31.6844	2991.82	3527.04	3202.44	3042.66	3397.94	3429.25	4478.1	5960.72	8421.75	TSHZ2	1					X	X	3289.95	3240.43	6286.86	-0.0218793	0.934273	0.956152
75.16_1512.7020n	1	1	#4640	2	75.1622	1512.7	4.7717	AYGPGIEPtGNMVK	P21333	Filamin-A OS=Homo sapiens OX=9606 GN=FLNA PE=1 SV=4	1.25178	Covid	RHEM	0.355787	39.9411	9153.77	8932.2	7530.53	8149.44	8152.6	8430.21	4602.34	5999.53	9862.19	FLNA	9	T385	SQGDASKVtAQGPGLEPSGNIANKTTYFEIFTAGAGTGEVEVVIQDPMGQK	FLNA_T385				8244.08	8538.83	6821.35	0.0506801	-0.273301	-0.323982
75.16_1698.7669n	1	1	#991	2	75.1622	1698.77	4.5523	AAsEWLLRCGAMVR	Q99766	ATP synthase subunit s_ mitochondrial OS=Homo sapiens OX=9606 GN=DMAC2L PE=1 SV=3	4.23004	Covid	RHEM	9.60687e-05	24.5765	27399	27806	22599.1	19099	18200.7	20139.1	4453.75	6569.23	7370.25	DMAC2L	3				X	X	X	19146.3	25934.7	6131.08	0.437821	-1.64285	-2.08067
76.55_2527.1612n	1	1	#3994	3	76.5545	2527.16	4.6365	NGQHVAsSPIPVVISQSEIGDASR	P21333	Filamin-A OS=Homo sapiens OX=9606 GN=FLNA PE=1 SV=4	1.37235	Covid	RHEM	0.0087592	13.1231	14005.3	13437.3	12535.2	10117.7	11002.4	10755.4	11176.2	8866.71	9088.07	FLNA	7	T500	GVRVKEtADFK	FLNA_T500	X		X	10625.2	13325.9	9710.32	0.326748	-0.129898	-0.456646
76.59_2977.2685n	1	1	#17310	3	76.5884	2977.27	4.5556	KEGICAIGGtSEQSSVGTQHSYSEEEK	P13796	Plastin-2 OS=Homo sapiens OX=9606 GN=LCP1 PE=1 SV=6	3.30791	Covid	RHEM	0.000577735	28.3141	4823.69	3991.26	3411.52	3107.88	3469.8	3617.19	904.878	1192.12	1599.13	LCP1	10					X	X	3398.29	4075.49	1232.04	0.262164	-1.46376	-1.72592
76.78_2181.8661n	1	1	#16737	2	76.7772	2181.87	4.6327	GAVySFDPVGSYQRDsFK	P20618	Proteasome subunit beta type-1 OS=Homo sapiens OX=9606 GN=PSMB1 PE=1 SV=2	11.2241	Covid	RHEM	8.39288e-06	28.5302	3339.97	2695.02	1845.7	2140.09	2323.84	2251.76	261.841	242.457	197.825	PSMB1	4	Y150	GAVySFDPVGSYQRDSFK	PSMB1_Y150		X	X	2238.57	2626.9	234.041	0.230784	-3.25774	-3.48853
76.78_2181.8661n	1	1	#16737	2	76.7772	2181.87	4.6327	GAVySFDPVGSYQRDsFK	P20618	Proteasome subunit beta type-1 OS=Homo sapiens OX=9606 GN=PSMB1 PE=1 SV=2	11.2241	Covid	RHEM	8.39288e-06	28.5302	3339.97	2695.02	1845.7	2140.09	2323.84	2251.76	261.841	242.457	197.825	PSMB1	16	S162	GAVYSFDPVGSYQRDsFK	PSMB1_S162		X	X	2238.57	2626.9	234.041	0.230784	-3.25774	-3.48853
77.54_2843.2703n	1	1	#13928	3	77.5408	2843.27	4.5586	WDTANNPLYKEATSTFtNITYRGT	P05106	Integrin beta-3 OS=Homo sapiens OX=9606 GN=ITGB3 PE=1 SV=2	2.59196	RHEM	CTRL	0.00763163	42.2537	950.438	948.496	728.03	994.161	866.594	740.507	1641.95	1758.49	3341.93	ITGB3	17					X	X	867.087	875.655	2247.45	0.0141852	1.37404	1.35986
77.85_2464.1215n	1	1	#2853	3	77.8452	2464.12	4.2981	NQPRGDCDGVQINVPItFQVK	P05107	Integrin beta-2 OS=Homo sapiens OX=9606 GN=ITGB2 PE=1 SV=2	1.65623	CTRL	RHEM	0.000290448	10.7941	23081.2	21904.3	20473.7	22416	22801	21009.1	13899.3	11692.2	14394.6	ITGB2	17					X	X	22075.4	21819.7	13328.7	-0.0168053	-0.727902	-0.711097
79.70_2833.3130n	1	1	#10417	3	79.6965	2833.31	5.1261	GsQAQPDSPSAQLALIAASQSFLQPGGK	Q9Y490	Talin-1 OS=Homo sapiens OX=9606 GN=TLN1 PE=1 SV=3	2.35729	Covid	RHEM	0.0811408	105.463	2860.97	2289.51	2241.89	2185.38	2326.74	2440.84	2313.96	320.159	501.842	TLN1	2							2317.65	2464.12	1045.32	0.08841	-1.14872	-1.23713
80.31_1758.7946n	1	1	#7483	2	80.3052	1758.79	4.7801	ALSVAELtQQMFDAR	Q9H4B7	Tubulin beta-1 chain OS=Homo sapiens OX=9606 GN=TUBB1 PE=1 SV=1	1.53727	RHEM	CTRL	0.0354605	22.7112	7312.19	7554.13	6907.3	6803.57	6268.87	6182.85	7281.89	11059.3	11259.4	TUBB1	8				X	X		6418.43	7257.87	9866.86	0.177326	0.620371	0.443045
80.63_2833.3075n	1	1	#16464	3	80.6292	2833.31	5.2727	GsQAQPDSPSAQLALIAASQSFLQPGGK	Q9Y490	Talin-1 OS=Homo sapiens OX=9606 GN=TLN1 PE=1 SV=3	3.23924	RHEM	CTRL	0.0283889	68.8623	1641.41	2052.49	1792.24	1467.08	1599.33	1732.18	3199.88	9300.18	3043.74	TLN1	2					X		1599.53	1828.72	5181.27	0.193181	1.69566	1.50247
80.87_1930.7271n	2	2	#821,#4187	2,3	80.8659	1930.73	5.0613	tMQFEPSTMVYDACR	Q9Y490	Talin-1 OS=Homo sapiens OX=9606 GN=TLN1 PE=1 SV=3	1.30999	Covid	RHEM	0.149615	24.8582	64092.2	59356.5	58212	50979	46603.4	49815.9	55364.9	49983.2	33325.2	TLN1	1				X			49132.8	60553.5	46224.4	0.301525	-0.0880303	-0.389555
82.85_4812.9542n	1	1	#2368	4	82.8528	4812.95	3.8489	DGSGVKEWEVYNFPAGGVGMGMYNTDEsISGFAHSCFQYAIQK	P48735	Isocitrate dehydrogenase [NADP]_ mitochondrial OS=Homo sapiens OX=9606 GN=IDH2 PE=1 SV=2	3.62778	CTRL	RHEM	1.63035e-05	14.0485	6941.62	7255.01	8546.64	8199.91	9984.2	10871.4	2495.25	2766.23	2747.68	IDH2	28					X	X	9685.17	7581.09	2669.72	-0.353372	-1.85909	-1.50572
82.87_2112.0318n	2	2	#17280,#838	2,3	82.8696	2112.03	4.8967	RILALCMGNHELyMRR	P26038	Moesin OS=Homo sapiens OX=9606 GN=MSN PE=1 SV=3	3.67157	Covid	RHEM	3.25657e-06	13.3396	49315.9	50571.9	46549.8	39397.2	40928.4	44390.3	12952.7	15214.3	11717.2	MSN	13				X	X	X	41572	48812.6	13294.8	0.23164	-1.64475	-1.8764
82.92_4632.8836n	1	1	#3953	4	82.9204	4632.88	4.834	AAGKGKVtCTVCTPDGSEVDVDVVENEDGTFDIFyTAPQPGK	P21333	Filamin-A OS=Homo sapiens OX=9606 GN=FLNA PE=1 SV=4	295.005	Covid	RHEM	4.68283e-08	28.4828	18792.8	17930	16306.2	9408.71	9537.67	9254.25	69.5145	40.2143	70.0275	FLNA	8	S2033	NGQHVASsPIPVVISQSEIGDASR	FLNA_S2033	X	X	X	9400.21	17676.3	59.9188	0.911054	-7.29354	-8.2046
82.92_4632.8836n	1	1	#3953	4	82.9204	4632.88	4.834	AAGKGKVtCTVCTPDGSEVDVDVVENEDGTFDIFyTAPQPGK	P21333	Filamin-A OS=Homo sapiens OX=9606 GN=FLNA PE=1 SV=4	295.005	Covid	RHEM	4.68283e-08	28.4828	18792.8	17930	16306.2	9408.71	9537.67	9254.25	69.5145	40.2143	70.0275	FLNA	35				X	X	X	9400.21	17676.3	59.9188	0.911054	-7.29354	-8.2046
83.65_1474.6723n	1	1	#672	2	83.6502	1474.67	4.7245	KNsVVEASEAAYK	Q04917	14-3-3 protein eta OS=Homo sapiens OX=9606 GN=YWHAH PE=1 SV=4	4.1162	Covid	RHEM	2.93371e-07	9.41008	34746.2	30911.7	28908.7	20337.1	21202.5	21361.5	7494.52	7506.11	7973.61	YWHAH	3				X	X	X	20967	31522.2	7658.08	0.588246	-1.45307	-2.04131
85.70_3266.3947n	1	1	#5467	3	85.7047	3266.39	4.8936	MsSSHSRAGQSAAGAAPGGGVDTRDAEMPATEK	P21333	Filamin-A OS=Homo sapiens OX=9606 GN=FLNA PE=1 SV=4	19.5152	Covid	RHEM	8.55526e-06	36.6588	7917.55	7213.02	7938.99	6350.45	6553.32	6931.18	445.201	505.956	230.976	FLNA	2	Y287	AyGPGIEPTGNMVK	FLNA_Y287	X	X	X	6611.65	7689.85	394.044	0.217945	-4.06858	-4.28653
85.70_3266.3947n	1	1	#5467	3	85.7047	3266.39	4.8936	MsSSHSRAGQSAAGAAPGGGVDTRDAEMPATEK	P21333	Filamin-A OS=Homo sapiens OX=9606 GN=FLNA PE=1 SV=4	19.5152	Covid	RHEM	8.55526e-06	36.6588	7917.55	7213.02	7938.99	6350.45	6553.32	6931.18	445.201	505.956	230.976	FLNA	2	S2	MsSSHSRAGQSAAGAAPGGGVDTRDAEMPATEK	FLNA_S2	X	X	X	6611.65	7689.85	394.044	0.217945	-4.06858	-4.28653
85.94_3020.3006n	1	1	#28256	3	85.9414	3020.3	4.5619	EsCDSALRAYVKDHYSNGFCTVYAK	P52907	F-actin-capping protein subunit alpha-1 OS=Homo sapiens OX=9606 GN=CAPZA1 PE=1 SV=3	6.90391	CTRL	RHEM	1.45167e-07	10.5952	1011.1	1111.14	1148.48	1283.51	1541.77	1560.83	214.075	216.036	205.197	CAPZA1	2	S123	EsCDSALRAYVKDHYSNGFCTVYAK	CAPZA1_S123	X	X	X	1462.04	1090.24	211.769	-0.423335	-2.78741	-2.36408
86.11_4119.8328n	1	1	#4096	4	86.1105	4119.83	5.0484	IPEIsIQDMTAQVTSPSGKTHEAEIVEGENHTYCIR	P21333	Filamin-A OS=Homo sapiens OX=9606 GN=FLNA PE=1 SV=4	5.6393	CTRL	RHEM	0.000104929	36.9634	10704.9	10563.1	10728.3	10718.4	10743.9	12066.5	1269.33	1943.31	2732.92	FLNA	5					X	X	11176.3	10665.4	1981.85	-0.0674938	-2.49552	-2.42802
86.54_2392.0493n	1	1	#20298	2	86.536	2392.05	5.235	sAGQGEVLVYVEDPAGHQEEAK	P21333	Filamin-A OS=Homo sapiens OX=9606 GN=FLNA PE=1 SV=4	74.7054	CTRL	RHEM	0.00404802	173.205	1263.67	1387.03	1843.82	1559.3	1440.95	1620.29	61.8503	0	0	FLNA	1	S310	sAGQGEVLVYVEDPAGHQEEAK	FLNA_S310		X	X	1540.18	1498.17	20.6168	-0.0398989	-6.22314	-6.18324
86.54_2392.0493n	1	1	#20298	2	86.536	2392.05	5.235	sAGQGEVLVYVEDPAGHQEEAK	P21333	Filamin-A OS=Homo sapiens OX=9606 GN=FLNA PE=1 SV=4	74.7054	CTRL	RHEM	0.00404802	173.205	1263.67	1387.03	1843.82	1559.3	1440.95	1620.29	61.8503	0	0	FLNA	1	S377	sQGDASKVTAQGPGLEPSGNIANKTTYFEIFTAGAGTGEVEVVIQDPMGQK	FLNA_S377		X	X	1540.18	1498.17	20.6168	-0.0398989	-6.22314	-6.18324
86.91_1892.7531n	2	2	#6,#353	2,3	86.9079	1892.75	4.2827	DDDYAGFVFGyQSSSR	P07996	Thrombospondin-1 OS=Homo sapiens OX=9606 GN=THBS1 PE=1 SV=2	1.63558	RHEM	CTRL	0.00217997	13.9643	464147	440995	437516	337108	299490	340296	586172	563933	447682	THBS1	11	Y1029	DDDYAGFVFGyQSSSR	THBS1_Y1029	X	X		325631	447553	532596	0.458819	0.7098	0.250982
88.54_5290.5696n	1	1	#8216	5	88.5369	5290.57	4.5657	SQGDASKVTAQGPGLEPsGNIANKTTYFEIFTAGAGTGEVEVVIQDPMGQK	P21333	Filamin-A OS=Homo sapiens OX=9606 GN=FLNA PE=1 SV=4	9.6279	Covid	CTRL	0.00013815	35.0152	18920.1	13028.5	9542.8	2000.79	1035.26	1273.45	1981.32	2134.7	1701.47	FLNA	18	S394	SQGDASKVTAQGPGLEPsGNIANKTTYFEIFTAGAGTGEVEVVIQDPMGQK	FLNA_S394	X		X	1436.5	13830.5	1939.16	3.26722	0.432879	-2.83434
90.19_2839.4271n	2	2	#797,#11456	3,4	90.1855	2839.43	4.8513	KTQEQLALEMAELtARISQLEMAR	P26038	Moesin OS=Homo sapiens OX=9606 GN=MSN PE=1 SV=3	9.30594	Covid	RHEM	2.01728e-06	18.7993	22971.7	20593.3	18366.9	18845.4	15877.6	16377	2587.71	2301.29	1766.1	MSN	14					X	X	17033.3	20644	2218.37	0.277362	-2.94079	-3.21815
93.90_4171.7937n	1	1	#4267	4	93.9023	4171.79	4.0575	MDHEAAQLEKQHVHNVYESTAPyFsDLQSKAWPR	Q9P272	Probable tRNA methyltransferase 9B OS=Homo sapiens OX=9606 GN=TRMT9B PE=2 SV=3	3.28139	CTRL	RHEM	6.33337e-05	19.6757	8154.66	8057.86	7642.04	9432.98	7509.95	7254.67	2987.95	2040.39	2345.86	TRMT9B	23					X	X	8065.87	7951.52	2458.06	-0.0205993	-1.71431	-1.69371
93.90_4171.7937n	1	1	#4267	4	93.9023	4171.79	4.0575	MDHEAAQLEKQHVHNVYESTAPyFsDLQSKAWPR	Q9P272	Probable tRNA methyltransferase 9B OS=Homo sapiens OX=9606 GN=TRMT9B PE=2 SV=3	3.28139	CTRL	RHEM	6.33337e-05	19.6757	8154.66	8057.86	7642.04	9432.98	7509.95	7254.67	2987.95	2040.39	2345.86	TRMT9B	25					X	X	8065.87	7951.52	2458.06	-0.0205993	-1.71431	-1.69371
94.14_2334.0924n	1	1	#14923	3	94.1392	2334.09	5.7318	TLAESALQLLytAKEAGGNPK	Q9Y490	Talin-1 OS=Homo sapiens OX=9606 GN=TLN1 PE=1 SV=3	9.61199	Covid	RHEM	0.00180882	60.8875	1408.36	1450.15	1469.39	1396.09	1060.81	1061.43	213.045	45.2712	191.944	TLN1	11					X	X	1172.77	1442.63	150.087	0.298779	-2.96606	-3.26483
94.14_2334.0924n	1	1	#14923	3	94.1392	2334.09	5.7318	TLAESALQLLytAKEAGGNPK	Q9Y490	Talin-1 OS=Homo sapiens OX=9606 GN=TLN1 PE=1 SV=3	9.61199	Covid	RHEM	0.00180882	60.8875	1408.36	1450.15	1469.39	1396.09	1060.81	1061.43	213.045	45.2712	191.944	TLN1	12					X	X	1172.77	1442.63	150.087	0.298779	-2.96606	-3.26483
94.67_2334.0904n	1	1	#20874	3	94.6662	2334.09	5.3935	TLAESALQLLytAKEAGGNPK	Q9Y490	Talin-1 OS=Homo sapiens OX=9606 GN=TLN1 PE=1 SV=3	7.33764	RHEM	CTRL	0.000589736	44.5837	460.337	671.957	462.115	335.154	260.786	282.226	3177.36	1982.65	1283.65	TLN1	11				X	X	X	292.722	531.47	2147.89	0.860458	2.87532	2.01486
94.67_2334.0904n	1	1	#20874	3	94.6662	2334.09	5.3935	TLAESALQLLytAKEAGGNPK	Q9Y490	Talin-1 OS=Homo sapiens OX=9606 GN=TLN1 PE=1 SV=3	7.33764	RHEM	CTRL	0.000589736	44.5837	460.337	671.957	462.115	335.154	260.786	282.226	3177.36	1982.65	1283.65	TLN1	12				X	X	X	292.722	531.47	2147.89	0.860458	2.87532	2.01486
95.97_4809.1816n	1	1	#8430	4	95.9709	4809.18	4.3053	CWALGFYPAEITLTWQRDGEDQTQDTELVEtRPAGDGTFQK	P01893	Putative HLA class I histocompatibility antigen_ alpha chain H OS=Homo sapiens OX=9606 GN=HLA-H PE=5 SV=3	8.93562	Covid	RHEM	0.00586138	71.1171	9049.28	8712.58	7786.31	4237.46	4619.77	4738.76	1079.01	1559.01	221.123	HLA-H	31				X	X	X	4532	8516.06	953.046	0.910038	-2.24953	-3.15957
96.70_2691.0833n	1	1	#11397	3	96.7007	2691.08	4.772	QAFTDVAtGsLGQGLGAACGMAYTGK	P29401	Transketolase OS=Homo sapiens OX=9606 GN=TKT PE=1 SV=3	3.64664	Covid	RHEM	0.00352782	60.8418	3470.45	3143.49	3065.2	3235.72	2847.36	2588.52	1506.16	586.608	561.495	TKT	8					X	X	2890.53	3226.38	884.755	0.158581	-1.70798	-1.86657
96.70_2691.0833n	1	1	#11397	3	96.7007	2691.08	4.772	QAFTDVAtGsLGQGLGAACGMAYTGK	P29401	Transketolase OS=Homo sapiens OX=9606 GN=TKT PE=1 SV=3	3.64664	Covid	RHEM	0.00352782	60.8418	3470.45	3143.49	3065.2	3235.72	2847.36	2588.52	1506.16	586.608	561.495	TKT	10	Y481	TSRPENAIIyNNNEDFQVGQAK	TKT_Y481		X	X	2890.53	3226.38	884.755	0.158581	-1.70798	-1.86657
96.73_2631.1144n	2	2	#1465,#64	2,3	96.7345	2631.11	4.6195	SDFDWHQDALsKSLQQNLPsR	Q9NRE2	Teashirt homolog 2 OS=Homo sapiens OX=9606 GN=TSHZ2 PE=1 SV=3	2.02829	Covid	RHEM	0.00539976	33.3533	143536	138233	129419	126658	121413	122967	93282.7	58235.4	51208.3	TSHZ2	11				X	X	X	123680	137063	67575.4	0.148228	-0.872037	-1.02026
96.73_2631.1144n	2	2	#1465,#64	2,3	96.7345	2631.11	4.6195	SDFDWHQDALsKSLQQNLPsR	Q9NRE2	Teashirt homolog 2 OS=Homo sapiens OX=9606 GN=TSHZ2 PE=1 SV=3	2.02829	Covid	RHEM	0.00539976	33.3533	143536	138233	129419	126658	121413	122967	93282.7	58235.4	51208.3	TSHZ2	20				X	X	X	123680	137063	67575.4	0.148228	-0.872037	-1.02026
